# Supplementary material for: Research trends and hotspots of recurrent pregnancy loss with thrombophilia: a bibliometric analysis
Source: PubMed Central journal article supplement (PMC9756660; doi:10.1186/s12884-022-05210-z), 2022-12-16
Supplement: 12884_2022_5210_MOESM1_ESM.pdf [file 12884_2022_5210_MOESM1_ESM.pdf]

Web of Science  
TS= recurrent pregnancy loss and TS= thrombophilia (n=608)  
TS= recurrent miscarriage and TS= thrombophilia(n=467)  
TS= recurrent Abortions and TS= thrombophilia(n=242)  
TS= habitual abortion and TS= thrombophilia(n=30)  
total n=1347

Duplicates  
removed(n=593)

Records left after  
duplicates removed  
(n=754)

Remove irrelevant  
literature after screening  
title and abstract  
(n=29)

Studies included  
in Bibliometric Analysis  
(n=725)
